# Supplementary material for: An amendedin vitro–in vivoextrapolation model that accounts for first pass clearance effects on chemical bioaccumulation in fish
Source: Royal Society of Chemistry journal article supplement (doi:10.1039/d2em00522k), 2023-01-01
Supplement: d2em00522k1.pdf [file d2em00522k1.pdf]

## SUPPORTING INFORMATION

### **An amended *in vitro-in vivo* extrapolation model that accounts for first pass clearance effects on chemical bioaccumulation in fish.**

Leslie J. Saunders<sup>a</sup>, John W. Nichols<sup>b</sup>, Jon A. Arnot<sup>a,c</sup>,  
James M. Armitage<sup>d</sup>, Frank Wania<sup>a</sup>

<sup>a</sup>Department of Physical and Environmental Science, University of Toronto Scarborough,  
Toronto, Ontario, Canada

<sup>b</sup>United States Environmental Protection Agency, Duluth, MN, USA

<sup>c</sup>ARC Arnot Research and Consulting, Toronto, Ontario, Canada

<sup>d</sup>AES Armitage Environmental Sciences Inc., Ottawa, Ontario, Canada

**6 pages containing 3 tables and 2 figures**

Content Summary

|                    |       |
|--------------------|-------|
| Tables S1–S3.....  | S2–S3 |
| Figures S1–S2..... | S4–S5 |
| References.....    | S6    |

## TABLES

Table S1. Hepatic extraction ratios ( $ER$ ; unitless) calculated at different assumed levels of *in vitro* hepatic activity ( $k_{\text{DEP,H}}$ ;  $\text{h}^{-1}$ ) at  $\log K_{\text{OW}}$  between 4 and 10. The mean  $ER$  value at each  $k_{\text{DEP,H}}$  between  $\log K_{\text{OW}}$  4 and 10 is also provided.

| $k_{\text{DEP,H}}$ | $\log K_{\text{OW}}$ |        |        |        |        |        |        | Mean   |
|--------------------|----------------------|--------|--------|--------|--------|--------|--------|--------|
|                    | 4                    | 5      | 6      | 7      | 8      | 9      | 10     |        |
| 0.01               | 0.0008               | 0.0007 | 0.0006 | 0.0005 | 0.0005 | 0.0004 | 0.0004 | 0.0006 |
| 0.05               | 0.0042               | 0.0033 | 0.0029 | 0.0027 | 0.0024 | 0.0022 | 0.0021 | 0.0028 |
| 0.1                | 0.0083               | 0.0065 | 0.0058 | 0.0053 | 0.0049 | 0.0045 | 0.0041 | 0.0056 |
| 0.5                | 0.0403               | 0.0318 | 0.0283 | 0.0259 | 0.0239 | 0.0220 | 0.0203 | 0.0275 |
| 1                  | 0.0775               | 0.0616 | 0.0551 | 0.0505 | 0.0466 | 0.0431 | 0.0398 | 0.0535 |
| 5                  | 0.2957               | 0.2472 | 0.2256 | 0.2102 | 0.1965 | 0.1837 | 0.1716 | 0.2187 |
| 10                 | 0.4564               | 0.3964 | 0.3682 | 0.3474 | 0.3285 | 0.3104 | 0.2930 | 0.3572 |
| 50                 | 0.8076               | 0.7666 | 0.7445 | 0.7269 | 0.7098 | 0.6924 | 0.6745 | 0.7318 |

Table S2. Input parameters used for the extrapolation of *in vitro* biotransformation data [1] used to derive extraction ratios for the liver ( $ER_{\text{H}}$ ) and intestinal epithelia ( $ER_{\text{G}}$ ). Extraction ratios for the liver and intestinal epithelia are presented in Table 3 of the main text.

| Parameter                                                                                                                                  | BAP   | PYR   | EHMC  | OCT   | Source                                     |
|--------------------------------------------------------------------------------------------------------------------------------------------|-------|-------|-------|-------|--------------------------------------------|
| <b>Chemical properties</b>                                                                                                                 |       |       |       |       |                                            |
| Octanol-water partition coefficient ( $K_{\text{OW}}$ ; L water L octanol <sup>-1</sup> )                                                  | 6.09  | 4.88  | 5.80  | 6.88  | [1]                                        |
| <b>Fish characteristics</b>                                                                                                                |       |       |       |       |                                            |
| Weight of extrapolated fish ( $W_{\text{B,E}}$ ; g)                                                                                        | 10    | 10    | 39    | 36    | [1]                                        |
| Acclimation temperature ( $T$ ; °C)                                                                                                        | 11    | 11    | 11    | 11    | [1]                                        |
| <b>Well-stirred liver model inputs</b>                                                                                                     |       |       |       |       |                                            |
| Fractional tissue blood flow ( $Q_{\text{FRAC}}$ ; unitless)                                                                               | 0.259 | 0.259 | 0.259 | 0.259 | [2]                                        |
| Cardiac output ( $Q_{\text{C}}$ ; L blood d <sup>-1</sup> kg fish <sup>-1</sup> )                                                          | 62    | 62    | 54    | 54    | [3]                                        |
| Clearance binding term ( $f_{\text{U}}$ ; unitless)                                                                                        | 0.022 | 0.026 | 0.023 | 0.021 | [1]                                        |
| Tissue blood flow ( $Q_{\text{L}}$ ; L blood d <sup>-1</sup> kg fish <sup>-1</sup> )                                                       | 7.16  | 7.16  | 7.16  | 7.16  | $Q_{\text{C}} \times Q_{\text{FRAC}}$      |
| Water content of S9 ( $v_{\text{WS9}}$ ; L water L S9 <sup>-1</sup> )                                                                      | 0.84  | 0.84  | 0.84  | 0.84  | [4]                                        |
| Water content of blood ( $v_{\text{WBL}}$ ; L water L blood <sup>-1</sup> )                                                                | 0.99  | 0.99  | 0.99  | 0.99  | [5]                                        |
| <b>Clearance estimates</b>                                                                                                                 |       |       |       |       |                                            |
| <i>In vitro</i> hepatic depletion rate constant ( $k_{\text{DEP,H}}$ ; $\text{h}^{-1}$ )                                                   | 39.90 | 17.98 | 3.60  | 0.88  | [1]                                        |
| <i>In vitro</i> intestinal epithelia depletion rate constant ( $k_{\text{DEP,G}}$ ; $\text{h}^{-1}$ )                                      | 9.35  | 4.23  | 1.42  | 1.68  | [1]                                        |
| <i>In vivo</i> hepatic intrinsic clearance rate ( $\text{CL}_{\text{INT,LIV}}$ ; L S9 d <sup>-1</sup> kg fish <sup>-1</sup> )              | 1172  | 528   | 105   | 25    | [1]                                        |
| <i>In vivo</i> intestinal epithelia intrinsic clearance rate ( $\text{CL}_{\text{INT,GIT}}$ ; L S9 d <sup>-1</sup> kg fish <sup>-1</sup> ) | 417.6 | 170.0 | 60.7  | 65.7  | [1]                                        |
| Hepatic clearance rate ( $\text{CL}_{\text{H}}$ ; L blood d <sup>-1</sup> kg fish <sup>-1</sup> )                                          | 10.46 | 7.95  | 2.35  | 0.60  | Table 2 of main text                       |
| Intestinal epithelia clearance rate ( $\text{CL}_{\text{G}}$ ; L blood d <sup>-1</sup> kg fish <sup>-1</sup> )                             | 5.88  | 3.41  | 1.26  | 1.24  | Table 2 of main text                       |
| Liver extraction ratio ( $ER_{\text{H}}$ ; unitless)                                                                                       | 0.650 | 0.488 | 0.141 | 0.043 | $\text{CL}_{\text{H}}/\text{Q}_{\text{L}}$ |
| Intestinal epithelia extraction ratio ( $ER_{\text{G}}$ ; unitless)                                                                        | 0.366 | 0.244 | 0.092 | 0.097 | $\text{CL}_{\text{G}}/\text{Q}_{\text{L}}$ |

Table S3. Oral bioavailability values ( $F$ ), extraction ratios for the intestinal epithelia ( $ER_G$ ) and liver ( $ER_H$ ), and calculated luminal gut transfer efficiency values ( $E_{D,LB}$ ; Equation 14 of main text) for test chemicals benzo(a)pyrene (BAP), pyrene (PYR), 2-ethylhexyl-4-methoxycinnamate (EHMC), and octocrylene (OCT). Values of  $ER_G$ ,  $ER_H$ , and  $E_{D,LB}$  were derived under different assumptions for *in vitro* activity (*in vitro* depletion rate constants in the liver [ $k_{DEP,H}$ ] and the intestinal epithelia [ $k_{DEP,G}$ ] are two and three-fold higher) and blood flows (blood flow rates [ $Q_L$ ] calculated at a lower [0.1] and higher [0.4] fractions of cardiac output [ $Q_C$ ]). All metrics are unitless values.<sup>a</sup>

| <b>Metric</b>                                 | <b>BAP</b>         | <b>PYR</b>         | <b>EHMC</b>        | <b>OCT</b>         |
|-----------------------------------------------|--------------------|--------------------|--------------------|--------------------|
| $F$                                           | 0.071 <sup>b</sup> | 0.020 <sup>c</sup> | 0.083 <sup>d</sup> | 0.031 <sup>d</sup> |
| $2 \times k_{DEP,H}$ and $2 \times k_{DEP,G}$ |                    |                    |                    |                    |
| $ER_H$                                        | 0.785              | 0.654              | 0.247              | 0.083              |
| $ER_G$                                        | 0.535              | 0.366              | 0.168              | 0.177              |
| $E_{D,LB}$                                    | 0.710              | 0.091              | 0.132              | 0.041              |
| $3 \times k_{DEP,H}$ and $3 \times k_{DEP,G}$ |                    |                    |                    |                    |
| $ER_H$                                        | 0.843              | 0.737              | 0.329              | 0.120              |
| $ER_G$                                        | 0.633              | 0.464              | 0.232              | 0.244              |
| $E_{D,LB}$                                    | 1.000              | 0.142              | 0.160              | 0.046              |
| $Q_L = 0.1 \times Q_C$                        |                    |                    |                    |                    |
| $ER_H$                                        | 0.824              | 0.709              | 0.297              | 0.105              |
| $ER_G$                                        | 0.599              | 0.427              | 0.207              | 0.218              |
| $E_{D,LB}$                                    | 1.000              | 0.120              | 0.148              | 0.044              |
| $Q_L = 0.4 \times Q_C$                        |                    |                    |                    |                    |
| $ER_H$                                        | 0.548              | 0.382              | 0.096              | 0.029              |
| $ER_G$                                        | 0.272              | 0.157              | 0.061              | 0.065              |
| $E_{D,LB}$                                    | 0.216              | 0.038              | 0.097              | 0.034              |

<sup>a</sup>Values of  $ER_G$ , and  $ER_H$  were derived from  $k_{DEP}$  values given by Saunders et al. [1] (Table S3)

<sup>b</sup>Average of values reported by Lo et al. [6,7] ( $n=3$ )

<sup>c</sup>Data obtained from Lo et al. [7] ( $n=1$ )

<sup>d</sup>Average of values reported by Saunders et al. [8] ( $n=3$ )

## FIGURES

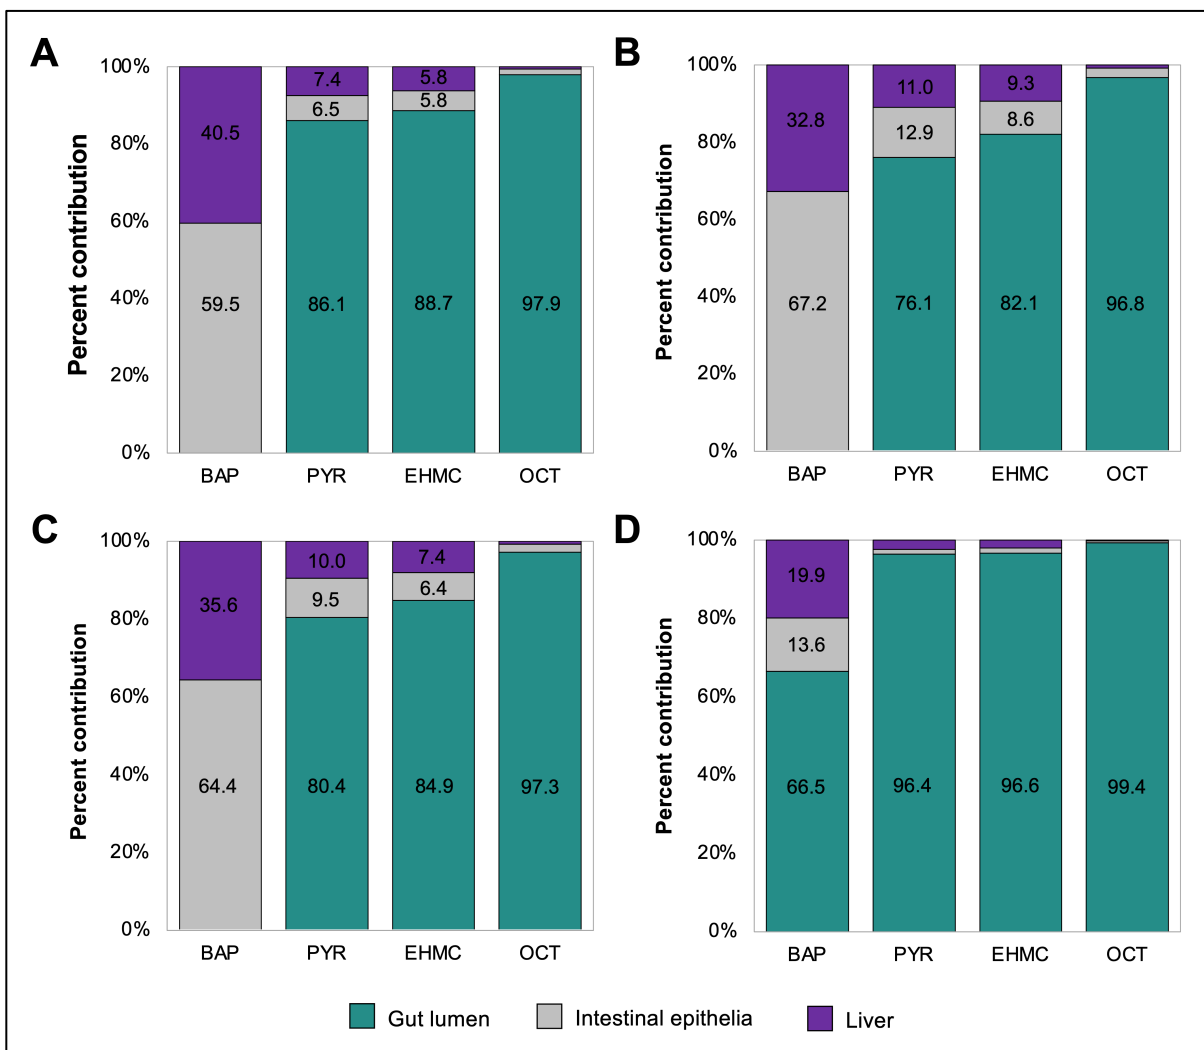

Figure S1. Estimated percent contribution of the liver (purple bars; Equation 15 of main text), intestinal epithelia (grey bars; Equation 16 of main text), and gut lumen (green bars; Equation 17 of main text) to overall presystemic biotransformation expressed relative to total contribution across all three compartments. Calculations are performed for the test chemicals benzo(a)pyrene (BAP), pyrene (PYR), 2-ethylhexyl-4-methoxycinnamate (EHMC), and octocrylene (OCT). The different panels display estimates using different estimates for *in vitro* activities in the liver ( $k_{\text{DEP,H}}$ ) and intestinal epithelia ( $k_{\text{DEP,G}}$ ) and for blood flow ( $Q_L$ ):  $2 \times k_{\text{DEP,H}}$  and  $2 \times k_{\text{DEP,G}}$  (Panel A),  $3 \times k_{\text{DEP,H}}$  and  $3 \times k_{\text{DEP,G}}$  (Panel B),  $Q_L = 0.10 \times Q_C$  (Panel C),  $Q_L = 0.40 \times Q_C$  (Panel D) where  $Q_C$  is cardiac output. Fractional contributions were calculated from parameters given in Table S3.

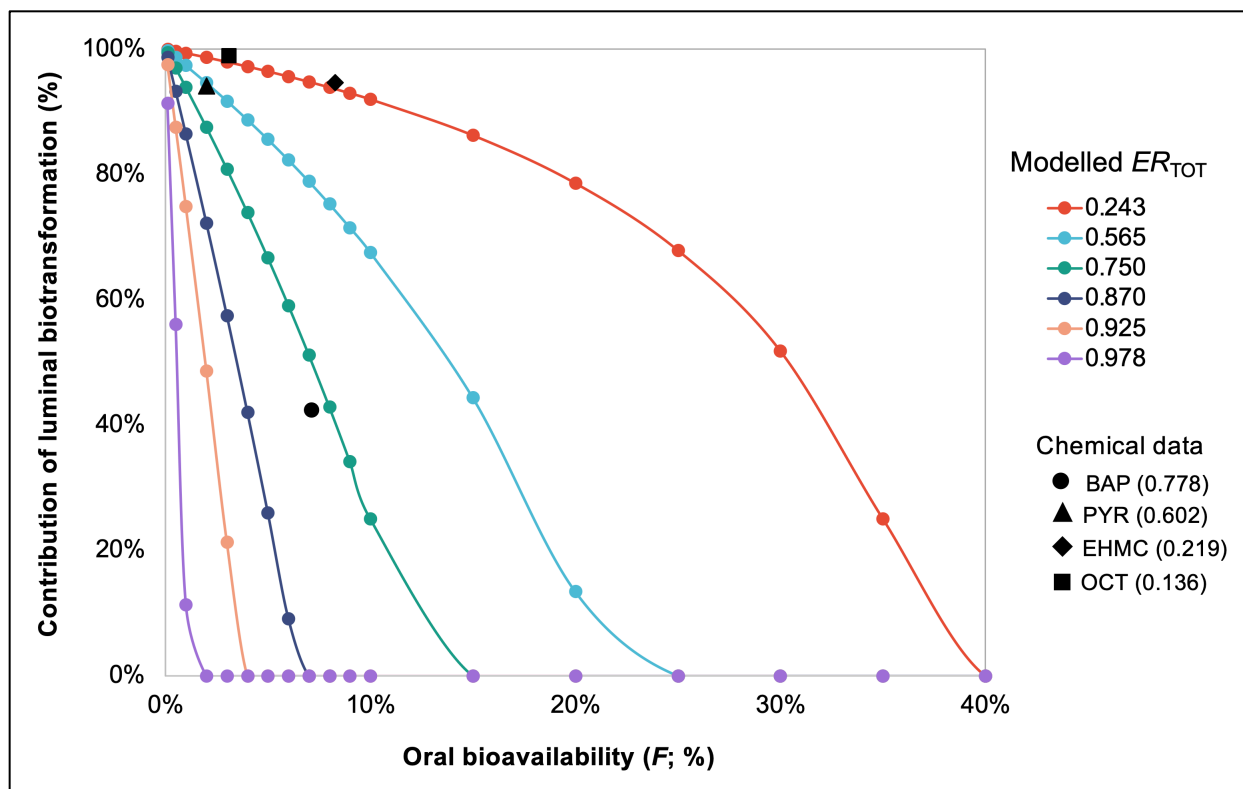

Figure S2. Estimated contribution of luminal biotransformation as a function of oral bioavailability ( $F$ ). Each colored line represents a modelled total extraction ratio ( $ER_{TOT}$ ) calculated from the individual extraction ratios for the liver ( $ER_H$ ) and intestinal epithelia ( $ER_G$ ) as  $1-ER_{TOT}=(1-ER_H) \times (1-ER_G)$ . The black datapoints represent the empirical data for four chemicals benzo(a)pyrene (BAP), pyrene (PYR), 2-ethylhexyl-4-methoxycinnamate (EHMC), and octocrylene (OCT). The empirical  $ER_{TOT}$  values are displayed in brackets in the figure legend and were generated for each chemical using input parameters described in Table S2.

## REFERENCES

- [1] Saunders LJ, Fitzsimmons PN, Nichols JW, Gobas FAPC. 2020. 'In vitro-in vivo extrapolation of hepatic and gastrointestinal biotransformation rates of hydrophobic chemicals in rainbow trout'. *Aquat Toxicol.* 228, 105629
- [2] Nichols JW, Huggett DB, Arnot JA, Fitzsimmons PN, Cowan-Ellsberry CE. 2013. Towards improved models for predicting bioconcentration of well-metabolized compounds by rainbow trout using measured rates of in vitro intrinsic clearance. *Environ. Toxicol. Chem.* 32, 1611–1612.
- [3] Erickson RJ, McKim JM, 1990. A model for exchange of organic chemicals at fish gills: Flow and diffusion limitations. *Aquat. Toxicol.* 18, 175–198.
- [4] Bertelsen SL, Hoffman AD, Gallinat CA, Elonen CM, Nichols JW. 1998. Evaluation of log $K_{ow}$  and tissue lipid content as predictors of chemical partitioning to fish tissues. *Environ. Toxicol. Chem.* 17, 1447–1455.
- [5] Saunders LJ, Fontanay S, Nichols JW, Gobas FAPC. 2019. Concentration dependence of in vitro biotransformation rates of hydrophobic organic sunscreen agents in rainbow trout S9 fractions: Implications for bioaccumulation assessment. *Environ. Toxicol. Chem.* 38, 548–560.
- [6] Lo et al. 2015 Lo, J.C., Campbell, D.A., Kennedy, C.J., Gobas, F.A.P.C., 2015. Somatic and gastrointestinal in vivo biotransformation rates of hydrophobic chemicals in fish. *Environ. Toxicol. Chem.* 34, 2282–2294.
- [7] Lo, J.C., Letinski, D.J., Parkerton, T.F., Campbell, D.A., Gobas, F.A.P.C., 2016. In vivo biotransformation rates of organic chemicals in fish: Relationship with bioconcentration and biomagnification factors. *Environ. Sci. Technol.* 50, 13299–13308.
- [8] Saunders, L.J., Hoffman, A.D., Nichols, J.W., Gobas, F.A.P.C., 2020. Dietary bioaccumulation and biotransformation of hydrophobic organic sunscreen agents in rainbow trout. *Environ. Toxicol. Chem.* 39, 574–586.
